# Supplementary material for: 3D nano-macroporous structured TiO2-foam glass as an efficient photocatalyst for organic pollutant treatment
Source: Royal Society of Chemistry journal article supplement (doi:10.1039/c6ra08768j), 2016-01-01
Supplement: c6ra08768j1.pdf [file c6ra08768j1.pdf]

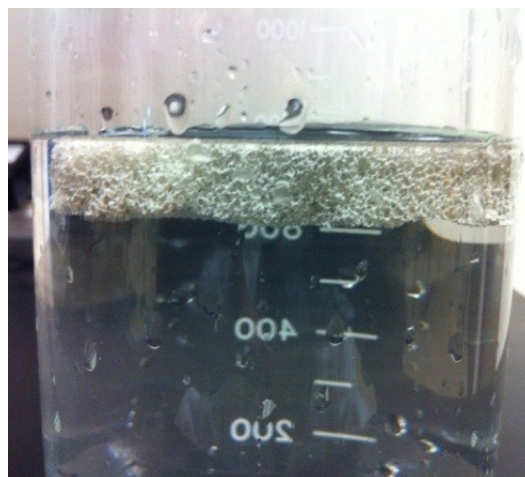

Figure S1 Pictures of the p-TiO<sub>2</sub>/FG floating on the top of water

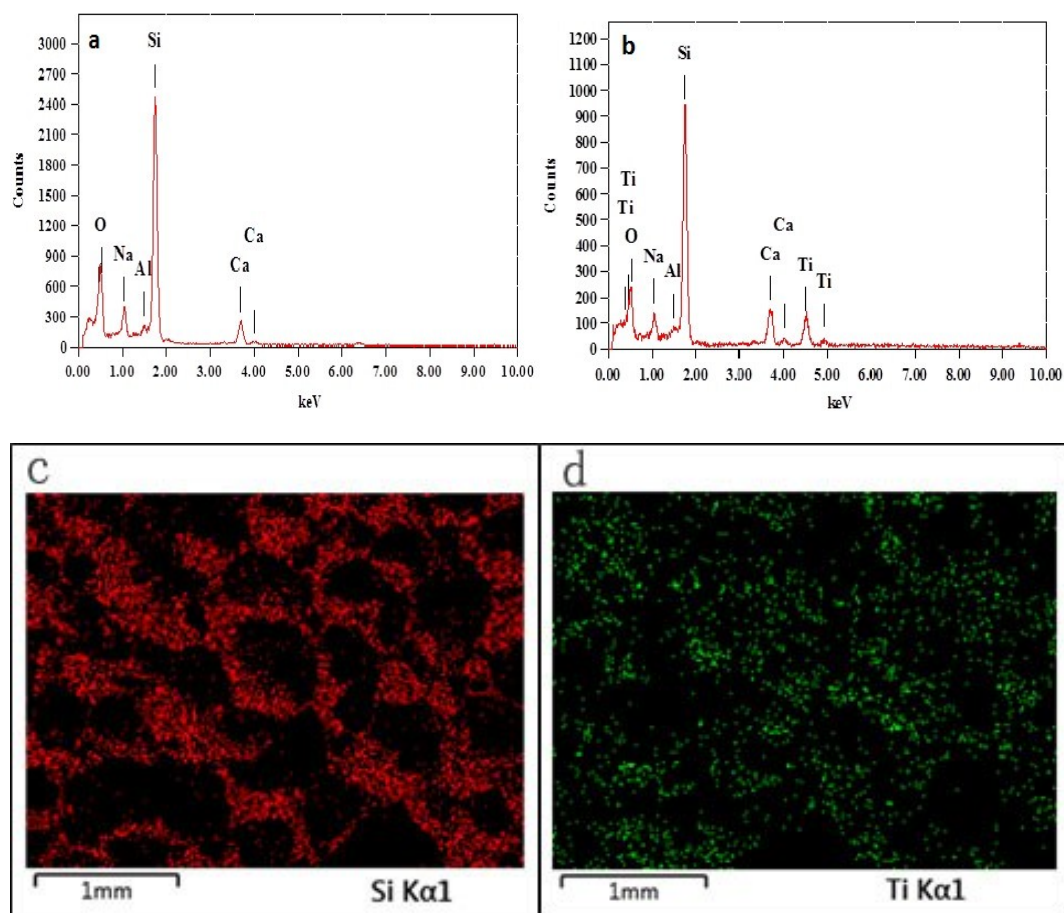

Figure S2 EDX patterns of the (a) FG and (b) p-TiO<sub>2</sub>/FG, element mapping of (c) Si and (d) Ti on p-TiO<sub>2</sub>/FG.

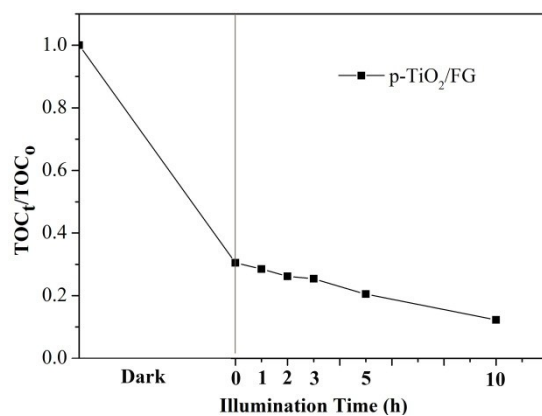

Figure S3 TOC removal efficiency of the MB aqueous solution using p-TiO<sub>2</sub>/FG as photocatalyst with UV light illumination

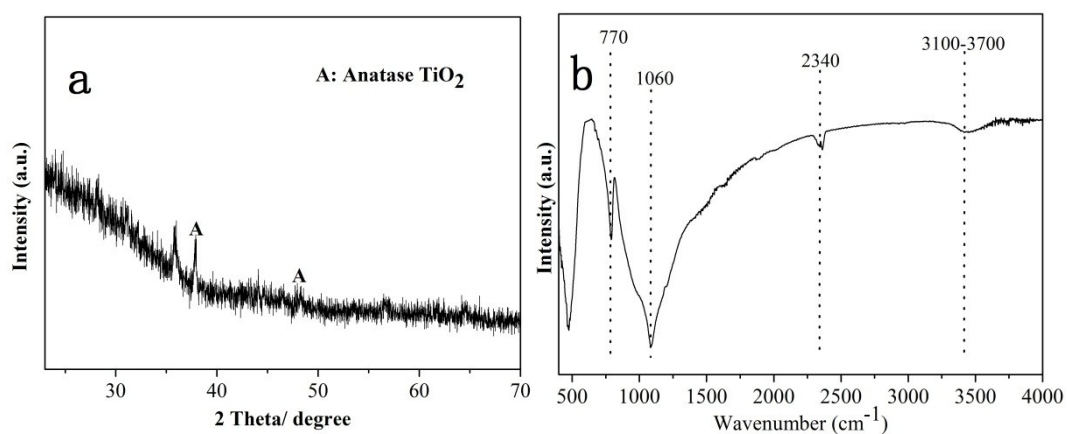

Figure S4 (a) XRD patterns and (b) FTIR spectra of the p-TiO<sub>2</sub>/FG photocatalyst after the wastewater treatment process
